# Supplementary material
Source: PubMed Central journal article supplement (PMC2756828)

**Fig 1**

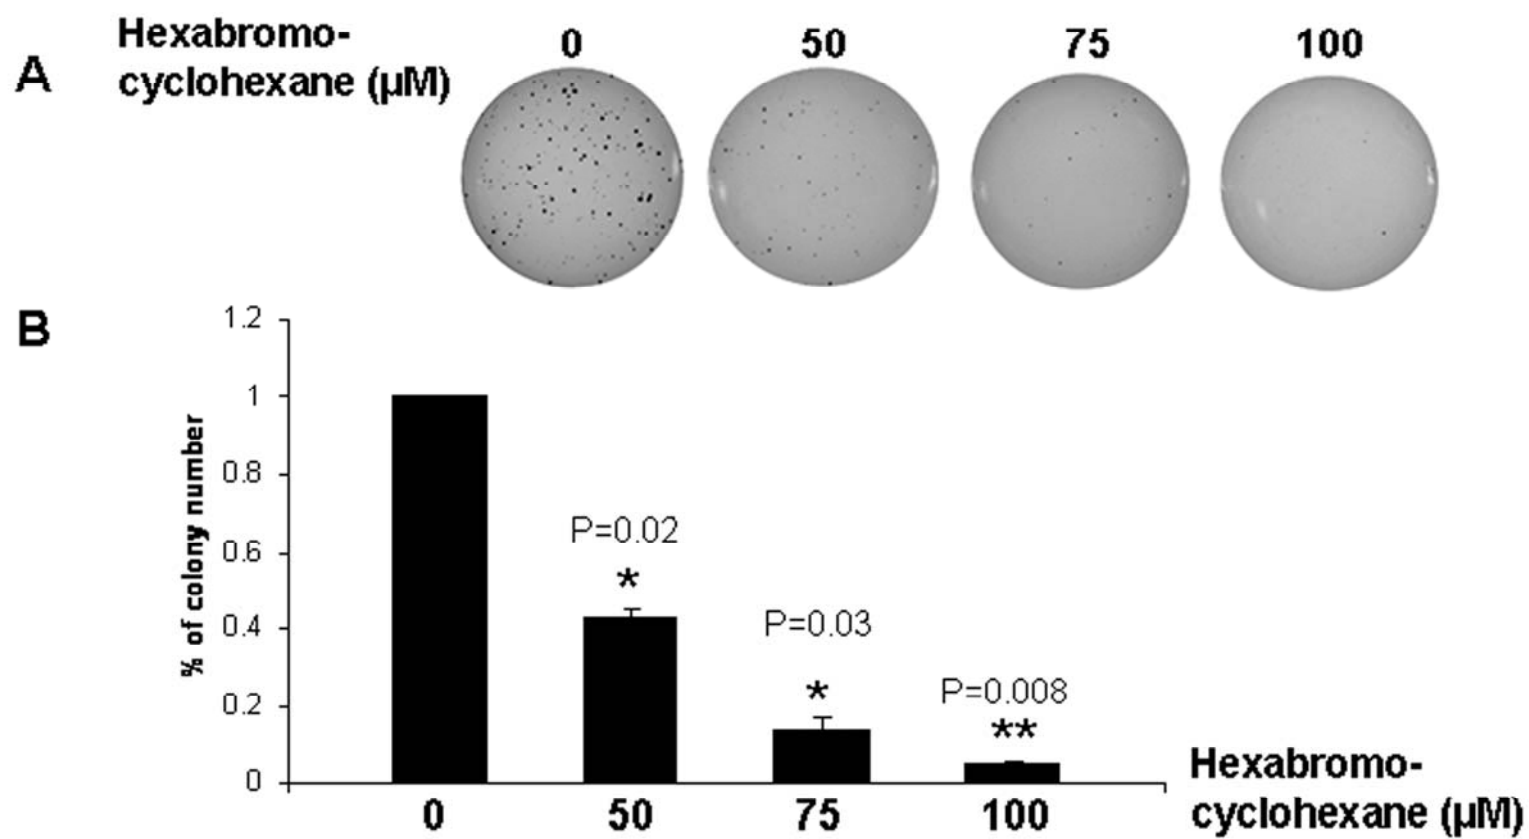

Supplement: NIHMS78267-supplement-Tao_Supp__Fig.pdf [file NIHMS78267-supplement-Tao_Supp__Fig.pdf]
